# Supplementary material
Source: PubMed Central journal article supplement (PMC5498362)
Supplement: CJN.12321216SupplementaryData.pdf [file CJN.12321216SupplementaryData.pdf]

Supplemental material is neither peer-reviewed nor thoroughly edited by CJASN. The authors alone are responsible for the accuracy and presentation of the material.

## **Multi-Center Registry Analysis of Center Characteristics Associated with Technique Failure in Incident Peritoneal Dialysis Patients**

Htay Htay<sup>\*,†,¶,§</sup>, Yeoungjee Cho<sup>\*,†,¶</sup>, Elaine M Pascoe<sup>¶</sup>, Darsy Darssan<sup>¶</sup>, Annie-Claire Nadeau-Fredette<sup>‡</sup>, Carmel Hawley<sup>\*,†,¶,||</sup>, Philip A. Clayton<sup>\*,||,‡‡</sup>, Monique Borlace<sup>||</sup>, Sunil V. Badve<sup>\*,¶</sup>, Kamal Sud<sup>\*,‡,††</sup>, Neil Boudville<sup>§§</sup>, Stephen P. McDonald<sup>\*,||,‡‡</sup>, David W Johnson<sup>\*,†,¶,||</sup>

\*Australia and New Zealand Dialysis and Transplant (ANZDATA) Registry, Sa Health and Medical Research Institute, Adelaide, Australia; †Department of Nephrology, Princess Alexandra Hospital, Brisbane, Australia; ‡Australasian Kidney Trial Network, Diamantina Institute, University of Queensland, Brisbane, Australia; §Department of Renal Medicine, Singapore General Hospital, Singapore; †Hôpital Maisonneuve-Rosemont, Université de Montreal, Montreal, Canada; ||Translational Research Institute, Brisbane, Australia; ||Central Northern Adelaide Renal and Transplantation Service, Royal Adelaide Hospital, Adelaide, Australia; ¶¶Department of Nephrology, St George Hospital, Sydney, Australia; ‡Departments of Renal Medicine, Nepean and Westmead Hospitals, Sydney, Australia; ††University of Sydney Medical School, Sydney, Australia; §§School of Medicine and Pharmacology, University of Western Australia, Australia; ‡‡School of Medicine, Faculty of Health Sciences, University of Adelaide, Adelaide, Australia.

Supplemental material is neither peer-reviewed nor thoroughly edited by CJASN. The authors alone are responsible for the accuracy and presentation of the material.

## **Multi-Center Registry Analysis of Center Characteristics Associated with Technique Failure in Incident Peritoneal Dialysis Patients**

Htay Htay<sup>1,2,3,4</sup>, Yeoungjee Cho<sup>1,2,3</sup>, Elaine M Pascoe<sup>3</sup>, Darsy Darssan<sup>3</sup>, Annie-Claire Nadeau-Fredette<sup>5</sup>, Carmel Hawley<sup>1,2,3,6</sup>, Philip A. Clayton,<sup>1,7</sup> Monique Borlace<sup>8</sup>, Sunil V. Badve,<sup>1,9</sup> Kamal Sud,<sup>1,10,11</sup> Neil Boudville<sup>12</sup>; Stephen P. McDonald<sup>1,7,13</sup>, David W Johnson<sup>1,2,3,6</sup>

### **Address for correspondence**

Professor David Johnson

Department of Nephrology, Level 2, ARTS Building,

Princess Alexandra Hospital

199 Ipswich Road, Woolloongabba, Brisbane Qld 4102 AUSTRALIA

Tel: +61 7 3176 5080, Fax: +61 7 3176 5480

Email: [david.johnson2@health.qld.gov.au](mailto:david.johnson2@health.qld.gov.au)

### Summary of Supplemental Tables and Figure

Supplemental Table 1 (Multivariable Cox shared frailty models for death-censored technique failure defined as 30 day and 180 day)

Supplemental Table 2 (Multivariable Cox shared frailty model of cause specific technique failure)

Supplemental Table 3 (Multivariable Cox shared frailty models for dropouts due to death and transplant)

Supplemental Figure 1 (Figure demonstration variation in hazard of death-censored technique failure across 51 Australian peritoneal dialysis centers during the period of 2004-2014)

Supplemental material is neither peer-reviewed nor thoroughly edited by CJASN. The authors alone are responsible for the accuracy and presentation of the material.

| Supplemental Table 1. Multivariable Cox shared frailty models for technique failure and death-censored technique failure in which PD proportion was substituted for center size. |                   |           |         |                                  |           |         |
|----------------------------------------------------------------------------------------------------------------------------------------------------------------------------------|-------------------|-----------|---------|----------------------------------|-----------|---------|
| Covariates                                                                                                                                                                       | Technique failure |           |         | Death-censored technique failure |           |         |
|                                                                                                                                                                                  | HR                | 95% CI    | p-value | HR                               | 95% CI    | p-value |
| Era (2004-2009)                                                                                                                                                                  | 1.0               | reference |         | 1.0                              | reference |         |
| Era (2010-2014)                                                                                                                                                                  | 0.87              | 0.82-0.92 | <0.001  | 0.92                             | 0.86-0.99 | 0.03    |
| <b>Patient-level characteristics</b>                                                                                                                                             |                   |           |         |                                  |           |         |
| Age (decade)                                                                                                                                                                     | 1.08              | 1.05-1.10 | <0.001  | 0.93                             | 0.91-0.96 | <0.001  |
| Male                                                                                                                                                                             | 1.00              | 0.95-1.06 | 0.89    | 1.07                             | 1.00-1.15 | 0.05    |
| Race                                                                                                                                                                             |                   |           | <0.001  |                                  |           | <0.001  |
| Caucasian                                                                                                                                                                        | 1.00              | reference |         | 1.00                             | reference |         |
| Asian                                                                                                                                                                            | 0.72              | 0.65-0.80 | <0.001  | 0.78                             | 0.70-0.89 | <0.001  |
| ATSI                                                                                                                                                                             | 1.05              | 0.93-1.18 | 0.46    | 1.11                             | 0.96-1.28 | 0.15    |
| MP                                                                                                                                                                               | 0.75              | 0.63-0.90 | 0.001   | 0.85                             | 0.69-1.03 | 0.11    |
| Other                                                                                                                                                                            | 0.60              | 0.48-0.75 | <0.001  | 0.67                             | 0.52-0.87 | 0.002   |
| BMI (kg/m <sup>2</sup> )                                                                                                                                                         |                   |           | <0.001  |                                  |           | <0.001  |
| <18.5                                                                                                                                                                            | 1.12              | 0.96-1.30 | 0.15    | 1.06                             | 0.88-1.23 | 0.54    |
| 18.5-24.9                                                                                                                                                                        | 1.00              | reference |         | 1.00                             | reference |         |
| 25-29.9                                                                                                                                                                          | 0.98              | 0.92-1.04 | 0.53    | 1.08                             | 0.99-1.17 | 0.07    |
| ≥30                                                                                                                                                                              | 1.12              | 1.04-1.20 | 0.001   | 1.28                             | 1.17-1.39 | <0.001  |
| Smoking status                                                                                                                                                                   |                   |           | 0.01    |                                  |           | 0.03    |
| Non-smoker                                                                                                                                                                       | 1.00              | reference |         | 1.00                             | reference |         |
| Current smoker                                                                                                                                                                   | 1.10              | 1.01-1.20 | 0.03    | 1.09                             | 0.98-1.21 | 0.11    |
| Former smoker                                                                                                                                                                    | 1.08              | 1.02-1.15 | 0.008   | 1.10                             | 1.02-1.19 | 0.01    |
| Diabetes mellitus                                                                                                                                                                | 1.05              | 0.96-1.15 | 0.29    | 0.98                             | 0.87-1.10 | 0.73    |
| Cardiovascular disease                                                                                                                                                           | 1.30              | 1.23-1.38 | <0.001  | 1.12                             | 1.03-1.21 | 0.003   |
| Chronic lung disease                                                                                                                                                             | 1.11              | 1.03-1.19 | 0.004   | 1.05                             | 0.96-1.16 | 0.28    |
| Primary renal disease                                                                                                                                                            |                   |           | 0.06    |                                  |           | <0.001  |
| Glomerulonephritis                                                                                                                                                               | 1.00              | reference |         | 1.00                             | reference |         |
| Diabetes nephropathy                                                                                                                                                             | 1.12              | 1.01-1.24 | 0.03    | 0.98                             | 0.86-1.11 | 0.74    |

Supplemental material is neither peer-reviewed nor thoroughly edited by CJASN. The authors alone are responsible for the accuracy and presentation of the material.

|                                      |      |           |        |      |           |        |
|--------------------------------------|------|-----------|--------|------|-----------|--------|
| Hypertension                         | 0.97 | 0.88-1.05 | 0.48   | 0.83 | 0.74-0.93 | 0.002  |
| Polycystic kidney disease            | 1.05 | 0.93-1.20 | 0.43   | 1.20 | 1.04-1.38 | 0.01   |
| Other/unknown                        | 0.98 | 0.91-1.07 | 0.70   | 0.86 | 0.78-0.95 | 0.003  |
| Late referral                        | 1.10 | 1.03-1.18 | 0.007  | 1.06 | 0.98-1.16 | 0.16   |
| <b>Initial modality of RRT (PD)¶</b> |      |           |        |      |           |        |
| Overall                              | 0.64 | 0.59-0.70 | <0.001 | 0.69 | 0.69-0.76 | <0.001 |
| at 6 months                          | 0.67 | 0.63-0.72 | <0.001 | 0.73 | 0.67-0.79 | <0.001 |
| at 1 year                            | 0.71 | 0.67-0.75 | <0.001 | 0.76 | 0.71-0.82 | <0.001 |
| at 2 years                           | 0.78 | 0.73-0.83 | <0.001 | 0.84 | 0.78-0.91 | <0.001 |
| Initial PD modality (CAPD)           | 0.88 | 0.82-0.94 | <0.001 | 0.99 | 0.90-1.08 | 0.76   |
| IRSAD scores#                        |      |           | 0.55   |      |           | 0.91   |
| <934                                 | 1.00 | reference |        | 1.00 | reference |        |
| 934-983                              | 0.98 | 0.91-1.06 | 0.68   | 1.02 | 0.93-1.12 | 0.65   |
| >983-1032                            | 0.98 | 0.91-1.06 | 0.61   | 1.02 | 0.93-1.12 | 0.69   |
| >1032                                | 0.95 | 0.87-1.02 | 0.16   | 0.99 | 0.90-1.10 | 0.88   |
| <b>Center-level characteristics</b>  |      |           |        |      |           |        |
| Transplant center                    | 1.04 | 0.94-1.16 | 0.42   | 0.98 | 0.83-1.14 | 0.77   |
| PD proportion                        |      |           | 0.009  |      |           | 0.002  |
| <18                                  | 0.99 | 0.90-1.09 | 0.80   | 1.09 | 0.93-1.28 | 0.28   |
| 18-29                                | 1.00 | reference |        | 1.00 | Reference |        |
| >29                                  | 0.83 | 0.73-0.94 | 0.003  | 0.73 | 0.58-0.92 | 0.007  |
| APD exposure@                        |      |           | 0.09   |      |           | 0.31   |
| <41%                                 | 1.12 | 1.01-1.24 | 0.02   | 1.13 | 0.95-1.35 | 0.16   |
| 41-71%                               | 1.00 | reference |        | 1.00 | reference |        |
| >71%                                 | 1.02 | 0.93-1.13 | 0.65   | 1.09 | 0.93-1.29 | 0.29   |
| Icodextrin use@                      |      |           | 0.48   |      |           | 0.92   |
| <35 %                                | 0.95 | 0.84-1.06 | 0.33   | 0.96 | 0.80-1.16 | 0.70   |
| 35-67%                               | 1.00 | reference |        | 1.00 | reference |        |
| >67%                                 | 1.02 | 0.93-1.13 | 0.65   | 0.98 | 0.84-1.15 | 0.83   |
| Phosphate in target@                 |      |           | 0.006  |      |           | 0.40   |

Supplemental material is neither peer-reviewed nor thoroughly edited by CJASN. The authors alone are responsible for the accuracy and presentation of the material.

|                 |      |           |      |      |           |      |
|-----------------|------|-----------|------|------|-----------|------|
| <40%            | 1.15 | 1.03-1.28 | 0.01 | 1.13 | 0.95-1.36 | 0.17 |
| 40-46%          | 1.00 | reference |      | 1.00 | reference |      |
| >46%            | 0.96 | 0.86-1.07 | 0.42 | 1.05 | 0.89-1.25 | 0.56 |
| Antifungal use* |      |           | 0.37 |      |           | 0.38 |
| <38%            | 1.00 | 0.90-1.11 | 1.0  | 1.01 | 0.84-1.22 | 0.89 |
| 38-86%          | 1.00 | reference |      | 1.00 | reference |      |
| >86%            | 1.08 | 0.97-1.21 | 0.17 | 1.14 | 0.94-1.38 | 0.38 |

@Percentage of all participating patients in the center

\*Percentage of peritonitis in center

¶ There was a significant interaction between initial modality of RRT and time ( $p < 0.001$ ). The overall HR and HR at three time points are given.

# Socioeconomic position reported as IRSAD scores with higher scores reflect higher socioeconomic position

APD, automated peritoneal dialysis; ATSI, Aboriginal and Torres Strait Islander; BMI, body mass index; CAPD, continuous ambulatory peritoneal dialysis; CI, confidence interval; HR, hazard ratio; IRSAD, Index of Relative Socio-economic Advantage and Disadvantage; MP, Maori-Pacific Islanders; PD, peritoneal dialysis; PET, peritoneal equilibration test; RRT, renal replacement therapy; yr, year.

Supplemental material is neither peer-reviewed nor thoroughly edited by CJASN. The authors alone are responsible for the accuracy and presentation of the material.

| Supplemental Table 2. Multivariable Cox shared frailty model of cause specific technique failure. |           |           |        |        |           |       |                     |           |        |            |           |       |
|---------------------------------------------------------------------------------------------------|-----------|-----------|--------|--------|-----------|-------|---------------------|-----------|--------|------------|-----------|-------|
| Covariates                                                                                        | Infection |           |        | Social |           |       | Inadequate dialysis |           |        | Mechanical |           |       |
|                                                                                                   | HR        | 95% CI    | p-val  | HR     | 95% CI    | p-val | HR                  | 95% CI    | p-val  | HR         | 95% CI    | p-val |
| Era (2004-2009)                                                                                   | 1.0       | reference |        | 1.0    | reference |       | 1.0                 | reference |        | 1.0        | reference |       |
| Era (2010-2014)                                                                                   | 0.64      | 0.57-0.72 | <0.001 | 1.22   | 1.00-1.47 | 0.045 | 0.95                | 0.80-1.12 | 0.55   | 0.93       | 0.80-1.09 | 0.38  |
| <b>Patient-level characteristics</b>                                                              |           |           |        |        |           |       |                     |           |        |            |           |       |
| Age(decade)                                                                                       | 1.01      | 0.95-1.05 | 0.82   | 1.04   | 0.97-1.11 | 0.27  | 0.78                | 0.74-0.83 | <0.001 | 0.97       | 0.92-1.03 | 0.33  |
| Male                                                                                              | 0.88      | 0.79-0.98 | 0.02   | 1.36   | 1.11-1.65 | 0.002 | 1.52                | 1.29-1.79 | <0.001 | 0.99       | 0.85-1.15 | 0.88  |
| Race                                                                                              |           |           | <0.001 |        |           | 0.07  |                     |           | 0.09   |            |           | 0.11  |
| Caucasian                                                                                         | 1.0       | Reference |        | 1.0    | reference |       | 1.0                 | reference |        | 1.0        | reference |       |
| Asian                                                                                             | 0.75      | 0.62-0.91 |        | 0.85   | 0.60-1.19 |       | 0.68                | 0.51-0.90 |        | 0.84       | 0.65-1.09 |       |
| ATSI                                                                                              | 1.23      | 0.99-1.52 |        | 1.63   | 1.11-2.37 |       | 0.79                | 0.55-1.13 |        | 0.93       | 0.66-1.31 |       |
| MP                                                                                                | 0.89      | 0.65-1.22 |        | 1.20   | 0.71-2.06 |       | 0.78                | 0.50-1.22 |        | 0.73       | 0.45-1.15 |       |
| Others                                                                                            | 0.56      | 0.36-0.87 |        | 1.05   | 0.54-2.02 |       | 0.68                | 0.38-1.19 |        | 0.45       | 0.24-0.84 |       |
| BMI                                                                                               |           |           | <0.001 |        |           | 0.58  |                     |           | <0.001 |            |           | 0.39  |
| <18.5                                                                                             | 1.32      | 1.00-1.75 |        | 0.81   | 0.44-1.49 |       | 0.70                | 0.41-1.18 |        | 0.94       | 0.61-1.44 |       |
| 18.5-24.9                                                                                         | 1.0       | Reference |        | 1.0    | reference |       | 1.0                 | reference |        | 1.0        | reference |       |
| 25-29.9                                                                                           | 1.06      | 0.94-1.21 |        | 1.11   | 0.90-1.37 |       | 1.18                | 0.98-1.42 |        | 0.99       | 0.83-1.18 |       |
| ≥30                                                                                               | 1.34      | 1.18-1.53 |        | 0.99   | 0.78-1.27 |       | 1.56                | 1.28-1.90 |        | 1.14       | 0.95-1.39 |       |

Supplemental material is neither peer-reviewed nor thoroughly edited by CJASN. The authors alone are responsible for the accuracy and presentation of the material.

|                                           |      |           |       |      |           |        |      |           |        |      |           |        |
|-------------------------------------------|------|-----------|-------|------|-----------|--------|------|-----------|--------|------|-----------|--------|
| Smoking status                            |      |           | 0.01  |      |           | 0.40   |      |           | 0.73   |      |           | 0.30   |
| Non-smoker                                | 1.0  | Reference |       | 1.0  | reference |        | 1.0  | reference |        | 1.0  | reference |        |
| Current smoker                            | 1.14 | 0.97-1.34 |       | 1.15 | 0.87-1.51 | 0.33   | 0.91 | 0.71-1.15 | 0.43   | 0.96 | 0.75-1.23 | 0.76   |
| Former smoker                             | 1.19 | 1.06-1.33 |       | 0.95 | 0.77-1.16 | 0.60   | 0.98 | 0.83-1.16 | 0.85   | 1.12 | 0.95-1.32 | 0.18   |
| Diabetes mellitus                         | 0.96 | 0.80-1.14 | 0.62  | 1.15 | 0.86-1.54 | 0.36   | 0.91 | 0.69-1.22 | 0.54   | 0.98 | 0.77-1.26 | 0.89   |
| Cardiovascular disease                    | 1.14 | 1.02-1.28 | 0.03  | 1.09 | 0.89-1.33 | 0.41   | 1.10 | 0.92-1.30 | 0.30   | 1.11 | 0.94-1.31 | 0.23   |
| Chronic lung disease                      | 1.01 | 0.87-1.16 | 0.91  | 1.24 | 0.97-1.57 | 0.08   | 1.04 | 0.83-1.31 | 0.73   | 0.99 | 0.79-1.23 | 0.90   |
| Primary renal disease                     |      |           | 0.008 |      |           | 0.89   |      |           | 0.04   |      |           | <0.001 |
| Glomerulonephritis                        | 1.0  | Reference |       | 1.0  | reference |        | 1.0  | reference |        | 1.0  | reference |        |
| Diabetes nephropathy                      | 1.13 | 0.92-1.38 |       | 0.95 | 0.68-1.34 |        | 1.04 | 0.76-1.42 |        | 0.71 | 0.53-0.95 |        |
| Hypertension                              | 0.83 | 0.60-0.99 |       | 1.05 | 0.78-1.42 |        | 0.68 | 0.51-0.90 |        | 0.88 | 0.69-1.12 |        |
| Polycystic kidney disease                 | 1.05 | 0.83-1.33 |       | 1.12 | 0.74-1.71 |        | 0.86 | 0.60-1.23 |        | 1.89 | 1.46-2.46 |        |
| Other/unknown                             | 0.83 | 0.72-0.98 |       | 0.93 | 0.71-1.22 |        | 0.81 | 0.65-1.00 |        | 0.97 | 0.79-1.20 |        |
| Late referral                             | 1.08 | 0.95-1.22 |       | 0.95 | 0.75-1.20 |        | 1.03 | 0.85-1.25 |        | 1.12 | 0.92-1.35 |        |
| Initial modality of RRT (PD) <sup>¶</sup> |      |           |       |      |           |        |      |           |        |      |           |        |
| Overall                                   | 0.77 | 0.66-0.91 | 0.002 | 0.42 | 0.33-0.55 | <0.001 | 0.51 | 0.40-0.65 | <0.001 | 0.84 | 0.68-1.03 | 0.09   |
| at 6 months                               | 0.79 | 0.69-0.90 |       | 0.50 | 0.40-0.62 |        | 0.55 | 0.45-0.68 |        | 0.87 | 0.73-1.04 |        |
| at 1 year                                 | 0.81 | 0.72-0.91 |       | 0.59 | 0.48-0.71 |        | 0.60 | 0.50-0.72 |        | 0.91 | 0.77-1.07 |        |
| at 2 years                                | 0.84 | 0.75-0.94 |       | 0.81 | 0.64-1.02 |        | 0.72 | 0.61-0.85 |        | 0.99 | 0.79-1.24 |        |

Supplemental material is neither peer-reviewed nor thoroughly edited by CJASN. The authors alone are responsible for the accuracy and presentation of the material.

|                                     |      |           |       |      |           |        |      |           |      |      |           |       |
|-------------------------------------|------|-----------|-------|------|-----------|--------|------|-----------|------|------|-----------|-------|
| Initial PD modality (CAPD)          | 1.05 | 0.92-1.20 |       | 1.04 | 0.83-1.32 |        | 0.74 | 0.61-0.90 |      | 1.14 | 0.93-1.40 |       |
| IRSAD scores#                       |      |           | 0.43  |      |           | 0.27   |      |           | 0.43 |      |           | 0.96  |
| <934                                | 1.0  | Reference |       | 1.0  | reference |        | 1.0  | reference |      | 1.0  | reference |       |
| 934-983                             | 0.91 | 0.79-1.05 |       | 1.22 | 0.95-1.56 |        | 1.03 | 0.82-1.28 |      | 1.0  | 0.80-1.23 |       |
| >983-1032                           | 0.93 | 0.80-1.07 |       | 1.08 | 0.83-1.40 |        | 1.16 | 0.93-1.44 |      | 1.04 | 0.84-1.29 |       |
| >1032                               | 0.89 | 0.76-1.03 |       | 0.97 | 0.74-1.27 |        | 1.16 | 0.92-1.47 |      | 0.99 | 0.79-1.23 |       |
| <b>Center-level characteristics</b> |      |           |       |      |           |        |      |           |      |      |           |       |
| Transplant center                   | 0.92 | 0.75-1.12 | 0.39  | 1.21 | 0.88-1.66 | 0.25   | 1.02 | 0.70-1.49 | 0.92 | 1.25 | 0.92-1.68 | 0.16  |
| Center size (incident patient/year) |      |           | 0.11  |      |           | 0.004  |      |           | 0.10 |      |           | 0.004 |
| <16                                 | 0.94 | 0.80-1.11 |       | 1.21 | 0.93-1.58 |        | 1.41 | 1.02-1.93 |      | 1.41 | 1.07-1.85 |       |
| 16-48                               | 1.0  | Reference |       | 1.0  | reference |        | 1.0  | reference |      | 1.0  | reference |       |
| >48                                 | 0.79 | 0.63-0.98 |       | 0.59 | 0.40-0.86 |        | 0.96 | 0.56-1.65 |      | 0.67 | 0.44-1.02 |       |
| APD exposure <sup>@</sup>           |      |           | 0.002 |      |           | 0.009  |      |           | 1.00 |      |           | 0.82  |
| <41%                                | 1.36 | 1.14-1.36 |       | 1.29 | 0.96-1.73 |        | 0.99 | 0.68-1.44 |      | 1.10 | 0.81-1.50 |       |
| 41-71%                              | 1.0  | Reference |       | 1.0  | reference |        | 1.0  | reference |      | 1.0  | reference |       |
| >71%                                | 1.15 | 0.96-1.37 |       | 1.53 | 1.16-2.01 |        | 1.0  | 0.71-1.40 |      | 1.05 | 0.78-1.40 |       |
| Icodextrin use                      |      |           | 0.17  |      |           | <0.001 |      |           | 0.14 |      |           | 0.40  |
| <35%                                | 0.83 | 0.68-1.01 |       | 0.83 | 0.60-1.13 |        | 0.72 | 0.49-1.06 |      | 1.21 | 0.88-1.67 |       |
| 35-67%                              | 1.0  | Reference |       | 1.0  | reference |        | 1.0  | reference |      | 1.0  | reference |       |



Supplemental material is neither peer-reviewed nor thoroughly edited by CJASN. The authors alone are responsible for the accuracy and presentation of the material.

|                                  |      |           |       |           |       |           |      |           |
|----------------------------------|------|-----------|-------|-----------|-------|-----------|------|-----------|
| >67%                             | 1.00 | 0.84-1.18 | 0.58  | 0.43-0.77 | 0.78  | 0.55-1.09 | 1.15 | 0.87-1.53 |
| Phosphate in target <sup>@</sup> |      |           | 0.03  |           | 0.002 |           | 0.56 | 0.13      |
| <40%                             | 1.22 | 1.01-1.46 | 1.62  | 1.19-2.21 | 0.93  | 0.63-1.37 | 0.96 | 0.69-1.32 |
| 40-46%                           | 1.0  | Reference | 1.0   | reference | 1.0   | reference | 1.0  | reference |
| >46%                             | 0.93 | 0.77-1.28 | 1.50  | 1.12-2.02 | 1.16  | 0.81-1.67 | 0.73 | 0.54-1.00 |
| Antifungal use*                  |      |           | 0.008 |           | 0.05  |           | 0.54 | 0.90      |
| <38%                             | 1.30 | 1.09-1.56 | 0.73  | 0.55-0.98 | 0.84  | 0.59-1.20 | 0.96 | 0.71-1.30 |
| 38-86%                           | 1.0  | Reference | 1.0   | reference | 1.0   | reference | 1.0  | reference |
| >86%                             | 1.24 | 1.02-1.50 | 1.09  | 0.79-1.45 | 1.06  | 0.71-1.57 | 1.05 | 0.75-1.46 |

<sup>@</sup>Percentage of all participating patients in center

\*Percentage of peritonitis in center

¶ There was a significant interaction between initial modality of RRT and time ( $p < 0.001$ ). The overall HR and HR at three time points are given.

# socioeconomic position reported as IRSAD scores with higher scores reflect higher socioeconomic position

APD, automated peritoneal dialysis; ATSI, Aboriginal and Torres Strait Islander; BMI, body mass index; CAPD, continuous ambulatory peritoneal dialysis; CI, confidence interval; HR, hazard ratio; IRSAD, Index of Relative Socio-economic Advantage and Disadvantage; MP, Maori-Pacific Islanders; PD, peritoneal dialysis; PET, peritoneal equilibration test; RRT, renal replacement therapy; yr, year.

Supplemental material is neither peer-reviewed nor thoroughly edited by CJASN. The authors alone are responsible for the accuracy and presentation of the material.

| Supplemental Table 3. Multivariable Cox shared frailty models for dropouts due to death and transplant. |       |           |         |            |           |         |
|---------------------------------------------------------------------------------------------------------|-------|-----------|---------|------------|-----------|---------|
| Covariates                                                                                              | Death |           |         | Transplant |           |         |
|                                                                                                         | HR    | 95% CI    | p-value | HR         | 95% CI    | p-value |
| Era (2004-2009)                                                                                         | 1.0   | reference |         | 1.0        | reference |         |
| Era (2010-2014)                                                                                         | 0.78  | 0.70-0.87 | <0.001  | 1.38       | 1.22-1.57 | <0.001  |
| <b>Patient-level characteristics</b>                                                                    |       |           |         |            |           |         |
| Age (decade)                                                                                            | 1.58  | 1.51-1.65 | <0.001  | 0.58       | 0.55-0.60 | <0.001  |
| Male                                                                                                    | 0.90  | 0.82-0.99 | 0.047   | 1.19       | 1.06-1.34 | 0.004   |
| Race                                                                                                    |       |           | <0.001  |            |           | <0.001  |
| Caucasian                                                                                               | 1.00  | reference |         | 1.00       | reference |         |
| Asian                                                                                                   | 0.60  | 0.50-0.70 | <0.001  | 0.63       | 0.52-0.76 | <0.001  |
| ATSI                                                                                                    | 1.02  | 0.81-1.27 | 0.88    | 0.17       | 0.11-0.27 | <0.001  |
| MP                                                                                                      | 0.56  | 0.40-0.79 | 0.001   | 0.24       | 0.14-0.42 | <0.001  |
| Other                                                                                                   | 0.41  | 0.25-0.65 | <0.001  | 0.26       | 0.16      | 0.44    |
| BMI (kg/m <sup>2</sup> )                                                                                |       |           | <0.001  |            |           | <0.001  |
| <18.5                                                                                                   | 1.11  | 0.96-1.30 | 0.12    | 1.12       | 0.97-1.28 | 0.13    |
| 18.5-24.9                                                                                               | 1.00  | reference |         | 1.00       | reference |         |
| 25-29.9                                                                                                 | 0.98  | 0.92-1.05 | 0.55    | 0.99       | 0.93-1.05 | 0.70    |
| ≥30                                                                                                     | 1.12  | 1.04-1.20 | 0.001   | 1.17       | 1.10-1.25 | <0.001  |
| Smoking status                                                                                          |       |           | 0.002   |            |           | <0.001  |
| Non-smoker                                                                                              | 1.00  | reference |         | 1.00       | reference |         |
| Current smoker                                                                                          | 1.31  | 1.13-1.53 | <0.001  | 0.57       | 0.47-0.70 | <0.001  |
| Former smoker                                                                                           | 1.11  | 0.99-1.22 | 0.05    | 0.94       | 0.83-1.07 | 0.37    |
| Diabetes mellitus                                                                                       | 1.28  | 1.11-1.48 | 0.001   | 0.69       | 0.52-0.91 | 0.01    |
| Cardiovascular disease                                                                                  | 1.78  | 1.60-1.97 | <0.001  | 0.57       | 0.48-0.67 | <0.001  |
| Chronic lung disease                                                                                    | 1.17  | 1.04-1.31 | 0.007   | 0.56       | 0.43-0.73 | <0.001  |
| Primary renal disease                                                                                   |       |           | <0.001  |            |           | <0.001  |
| Glomerulonephritis                                                                                      | 1.00  | reference |         | 1.00       | reference |         |
| Diabetes nephropathy                                                                                    | 1.28  | 1.11-1.99 | <0.001  | 1.07       | 0.78-1.45 | 0.68    |

Supplemental material is neither peer-reviewed nor thoroughly edited by CJASN. The authors alone are responsible for the accuracy and presentation of the material.

|                                      |      |           |        |      |           |        |
|--------------------------------------|------|-----------|--------|------|-----------|--------|
| Hypertension                         | 1.33 | 1.13-1.57 | 0.001  | 0.90 | 0.72-1.13 | 0.38   |
| Polycystic kidney disease            | 0.71 | 0.50-0.99 | 0.049  | 1.34 | 1.10-1.63 | 0.004  |
| Other/unknown                        | 1.45 | 1.24-1.70 | <0.001 | 0.71 | 0.61-0.83 | <0.001 |
| Late referral                        | 1.16 | 1.03-1.30 | <0.001 | 0.74 | 0.63-0.86 | <0.001 |
| <b>Initial modality of RRT (PD)¶</b> |      |           |        |      |           |        |
| Overall                              | 0.51 | 0.44-0.59 | <0.001 | 1.31 | 1.07-1.60 | 0.009  |
| at 6 months                          | 0.54 | 0.48-0.62 | <0.001 | 1.29 | 1.08-1.53 | 0.004  |
| at 1 year                            | 0.57 | 0.51-0.64 | <0.001 | 1.27 | 1.09-1.48 | 0.002  |
| at 2 years                           | 0.65 | 0.59-0.71 | <0.001 | 1.23 | 1.08-1.41 | 0.002  |
| Initial PD modality (CAPD)           | 0.68 | 0.60-0.77 | <0.001 | 0.89 | 0.77-1.03 | 0.12   |
| IRSAD scores#                        |      |           | 0.13   |      |           | 0.13   |
| <934                                 | 1.00 | reference |        | 1.00 | reference |        |
| 934-983                              | 0.92 | 0.81-1.04 | 0.19   | 1.03 | 0.87-1.24 | 0.67   |
| >983-1032                            | 0.89 | 0.78-1.01 | 0.07   | 1.15 | 0.97-1.38 | 0.11   |
| >1032                                | 0.86 | 0.75-0.98 | 0.02   | 1.20 | 1.01-1.43 | 0.04   |
| <b>Center-level characteristics</b>  |      |           |        |      |           |        |
| Transplant center                    | 1.18 | 0.97-1.43 | 0.10   | 0.96 | 0.69-1.34 | 0.82   |
| Center size (incident patients/yr)   |      |           | 0.13   |      |           | 0.21   |
| <16                                  | 0.94 | 0.81-1.10 | 0.47   | 1.07 | 0.80-1.42 | 0.64   |
| 16-48                                | 1.00 | reference |        | 1.00 | reference |        |
| >48                                  | 1.13 | 0.91-1.42 | 0.26   | 0.68 | 0.42-1.08 | 0.10   |
| APD exposure®                        |      |           | 0.44   |      |           | 0.84   |
| <41%                                 | 0.96 | 0.80-1.15 | 0.63   | 1.10 | 0.79-1.52 | 0.57   |
| 41-71%                               | 1.00 | reference |        | 1.00 | reference |        |
| >71%                                 | 0.89 | 0.75-1.06 | 0.20   | 1.06 | 0.77-1.44 | 0.73   |
| Icodextrin use®                      |      |           | 0.24   |      |           | 0.11   |
| <35 %                                | 0.96 | 0.79-1.15 | 0.65   | 0.86 | 0.60-1.23 | 0.40   |
| 35-67%                               | 1.00 | reference |        | 1.00 | reference |        |
| >67%                                 | 1.14 | 0.96-1.34 | 0.14   | 0.72 | 0.53-0.99 | 0.04   |
| Phosphate in target®                 |      |           | 0.002  |      |           | 0.75   |

Supplemental material is neither peer-reviewed nor thoroughly edited by CJASN. The authors alone are responsible for the accuracy and presentation of the material.

|                 |      |           |       |      |           |      |
|-----------------|------|-----------|-------|------|-----------|------|
| <40%            | 1.12 | 0.93-1.34 | 0.24  | 1.09 | 0.77-1.53 | 0.62 |
| 40-46%          | 1.00 | reference |       | 1.00 | reference |      |
| >46%            | 0.77 | 0.64-0.93 | 0.006 | 0.94 | 0.69-1.29 | 0.71 |
| Antifungal use* |      |           | 0.58  |      |           | 0.44 |
| <38%            | 1.02 | 0.85-1.21 | 0.86  | 0.93 | 0.67-1.29 | 0.68 |
| 38-86%          | 1.00 | reference |       | 1.00 | reference | 0.61 |
| >86%            | 0.91 | 0.75-1.10 | 0.35  | 1.22 | 0.85-1.75 | 0.28 |

@Percentage of all participating patients in the center  
 \*Percentage of peritonitis in center  
 ¶ There was a significant interaction between initial modality of RRT and time (p<0.001). The overall HR and HR at three time points are given.  
 # socioeconomic position reported as IRSAD scores with higher scores reflect higher socioeconomic position  
 APD, automated peritoneal dialysis; ATSI, Aboriginal and Torres Strait Islander; BMI, body mass index; CAPD, continuous ambulatory peritoneal dialysis; CI, confidence interval; HR, hazard ratio; IRSAD, Index of Relative Socio-economic Advantage and Disadvantage; MP, Maori-Pacific Islanders; PD, peritoneal dialysis; PET, peritoneal equilibration test; RRT, renal replacement therapy; yr, year.

**Supplemental Figure 1.**

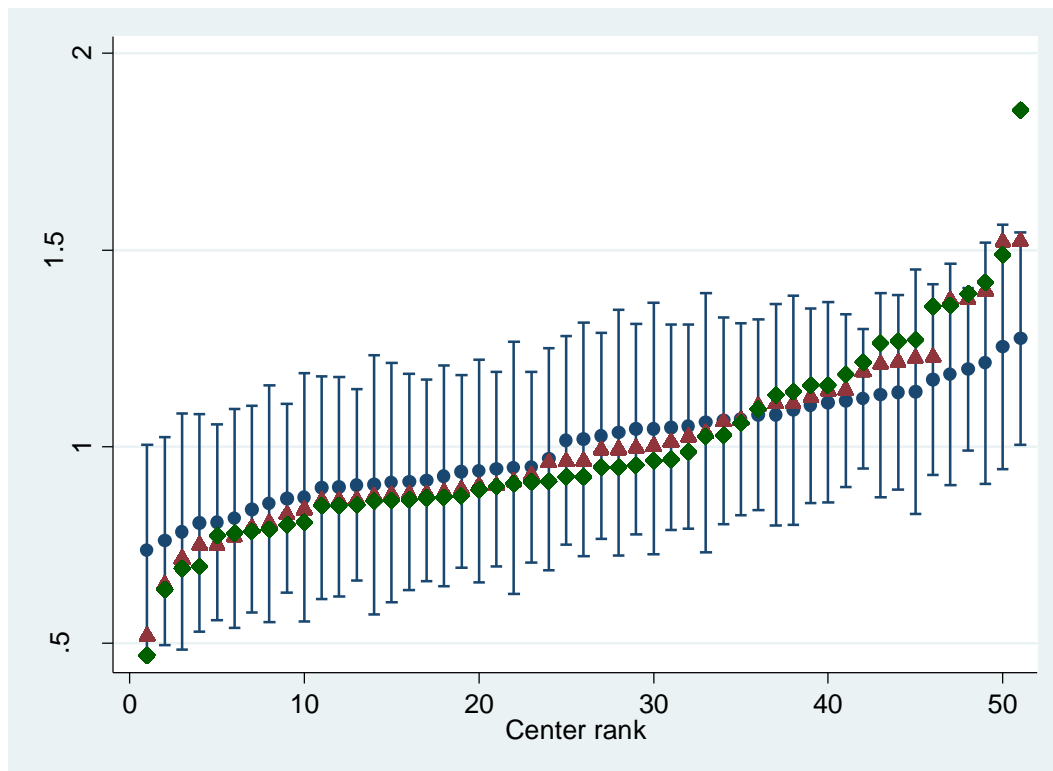

**Supplementary Figure 1.** Variation in hazard of death-censored technique failure across 51 Australian peritoneal dialysis centers during the period of 2004-2014 in unadjusted (green diamond), patient-level adjusted (red triangle) and patient- and center-level adjusted models (blue circle) with standard errors. Dialysis centers are ranked by hazard of death-censored technique failure.
